# Supplementary material for: A Cr2CO2 monolayer as a promising cathode for lithium and non-lithium ion batteries: a computational exploration
Source: Royal Society of Chemistry journal article supplement (doi:10.1039/c6ra13491b), 2016-01-01
Supplement: c6ra13491b1.pdf [file c6ra13491b1.pdf]

**Supporting Information**

**Cr<sub>2</sub>CO<sub>2</sub> Monolayer as Promising Cathode for Lithium and Non-lithium  
Ion Batteries: A Computational Exploration**

Fengyu Li,<sup>†</sup> Carlos R. Cabrera,<sup>†</sup> Jingyang Wang,<sup>‡</sup> Zhongfang Chen<sup>†,\*</sup>

*Department of Chemistry, The Institute for Functional Nanomaterials, University of  
Puerto Rico, Rio Piedras Campus, San Juan, PR 00931, USA, Shenyang National  
Laboratory for Materials Science, Institute of Metal Research, Chinese Academy of  
Sciences, Shenyang 110016, China*

Corresponding Author: [zhongfangchen@gmail.com](mailto:zhongfangchen@gmail.com)

We considered four configurations of  $\text{Cr}_2\text{CO}_2$  (see Figure S1): type I, in which all the O groups are attached on hollow sites of Cr atoms; type II, in which all the O groups are oriented above the C atoms on both sides of  $\text{Cr}_2\text{C}$  layer; type III, a combination of both types I and II, in which the O groups are placed above the hollow sites of Cr atoms on one side and above the top sites of C atoms on the other side, forming an asymmetric arrangement on the two sides of  $\text{Cr}_2\text{C}$  layer; type IV, the O groups are coordinated solely to the surface Cr atoms. Our computations revealed that type II is the lowest-energy structure.

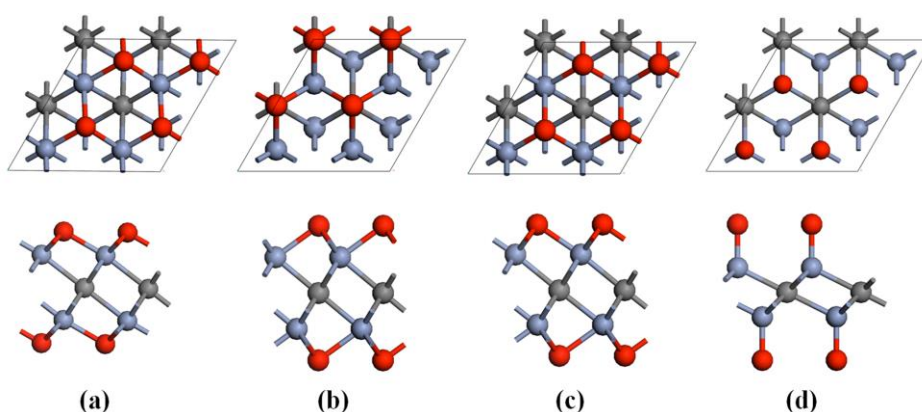

**Figure S1.** Top and side views of the optimized  $\text{Cr}_2\text{CO}_2$  with type I (a), II (b), III (c) and IV (d) configurations. Color scheme: light purple, Cr; gray, C; red, O.

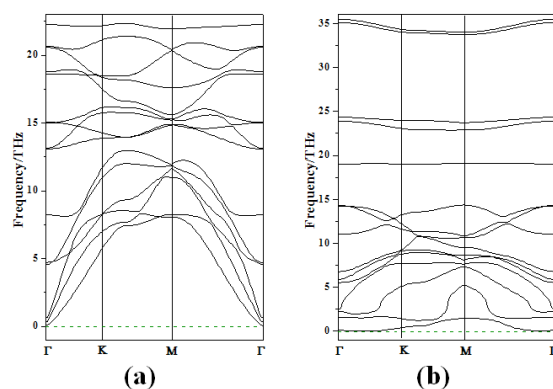

**Figure S2.** The phonon spectra of the optimized  $\text{Cr}_2\text{CO}_2$  with type II configuration (a) and the most stable  $\text{Cr}_2\text{CO}_2\text{Li}_2$  (b).

**Table S1** The  $k$ -point (plane-wave cut off energy was chosen as 500 eV) and the plane-wave cut off energy testing ( $k$ -point mesh was chosen as  $9\times 9\times 1$ ) results based on type II  $\text{Cr}_2\text{CO}_2$  monolayer.

|                       | k-point testing with $E_{\text{cut}}$ of 500 eV |                |              | $E_{\text{cut}}$ testing with k-point of $9\times 9\times 1$ |                |              |       |
|-----------------------|-------------------------------------------------|----------------|--------------|--------------------------------------------------------------|----------------|--------------|-------|
|                       | E/eV                                            | $a/\text{\AA}$ | mag/ $\mu_B$ | E/eV                                                         | $a/\text{\AA}$ | mag/ $\mu_B$ |       |
| $3\times 3\times 1$   | -42.156                                         | 2.699          | 0.000        | 300 eV                                                       | -44.505        | 2.617        | 0.000 |
| $5\times 5\times 1$   | -42.675                                         | 2.696          | 0.407        | 350 eV                                                       | -43.248        | 2.658        | 0.000 |
| $7\times 7\times 1$   | -42.714                                         | 2.693          | 0.000        | 400 eV                                                       | -42.836        | 2.681        | 0.000 |
| $9\times 9\times 1$   | -42.701                                         | 2.693          | 0.000        | 450 eV                                                       | -42.708        | 2.687        | 0.005 |
| $11\times 11\times 1$ | -42.706                                         | 2.693          | 0.000        | 500 eV                                                       | -42.701        | 2.693        | 0.000 |
| $13\times 13\times 1$ | -42.705                                         | 2.693          | 0.000        | 600 eV                                                       | -42.703        | 2.693        | 0.000 |

As shown in Table S1, the lattice parameter and magnetic moment become converged when the  $k$ -point and cut off energy are larger than  $9\times 9\times 1$  and 500 eV, and the energy difference between  $9\times 9\times 1/500$  eV and higher  $k$ -point/ $E_{\text{cut}}$  is less than 0.01 eV, so we chose  $9\times 9\times 1$   $k$ -points mesh and 500 eV cut off energy in our computations.

**Table S2** The total energy per unit cell ( $E$ ), lattice parameter ( $a$ ) and magnetic moment (mag) of the four possible  $\text{Cr}_2\text{CO}_2$  structures with non-magnetic (NM), ferro-magnetic (FM) and antiferro-magnetic (AFM) configurations.

|     | type I   |                |              | type II |                |              |       |
|-----|----------|----------------|--------------|---------|----------------|--------------|-------|
|     | E/eV     | $a/\text{\AA}$ | mag/ $\mu_B$ | E/eV    | $a/\text{\AA}$ | mag/ $\mu_B$ |       |
| NM  | -42.094  | 2.805          | --           | NM      | -42.700        | 2.692        | --    |
| FM  | -42.520  | 2.888          | 3.980        | FM      | -42.700        | 2.692        | 0.000 |
| AFM | -42.444  | 2.903          | 0.000        | AFM     | -42.700        | 2.692        | 0.000 |
|     | type III |                |              | type IV |                |              |       |
|     | E/eV     | $a/\text{\AA}$ | mag/ $\mu_B$ | E/eV    | $a/\text{\AA}$ | mag/ $\mu_B$ |       |
| NM  | -42.379  | 2.732          | --           | NM      | -41.001        | 3.146        | --    |
| FM  | -42.594  | 2.797          | 2.070        | FM      | -40.999        | 3.146        | 0.263 |
| AFM | -42.589  | 2.797          | 0.000        | AFM     | -40.998        | 3.146        | 0.000 |
